# Supplementary figures and images for: Pupal Age Estimation of Sarcophaga peregrina (Diptera: Sarcophagidae) at Different Constant Temperatures Utilizing ATR-FTIR Spectroscopy and Cuticular Hydrocarbons
Source: MDPI journal article supplement (doi:10.3390/insects14020143), 2023-01-31

Figure S1

**CHCs**

(A)

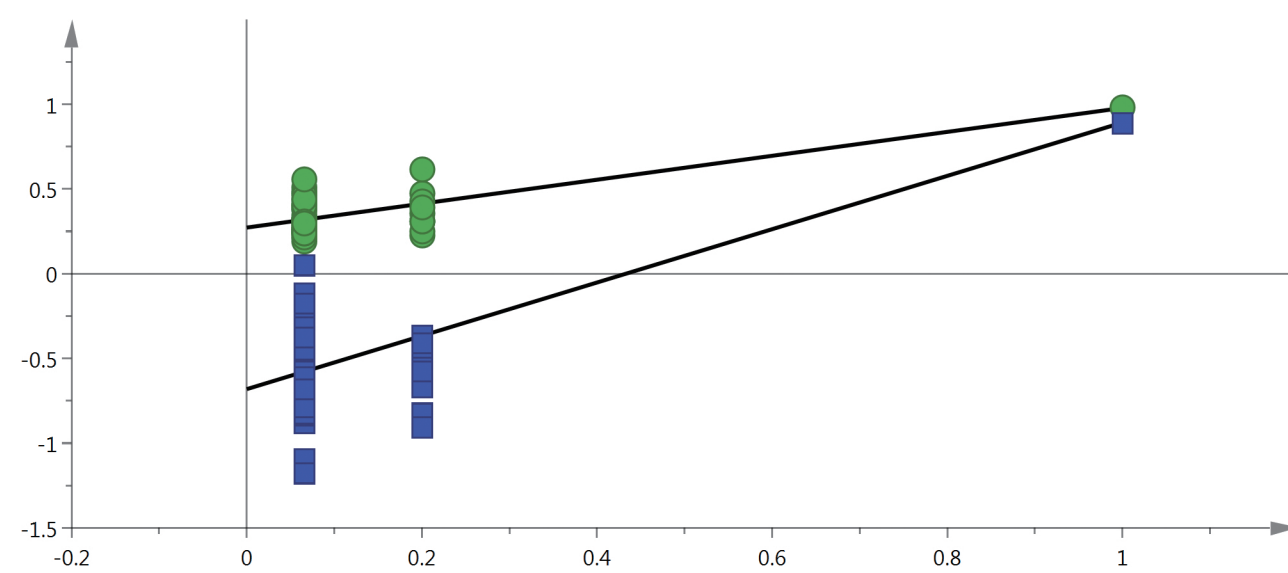

(B)

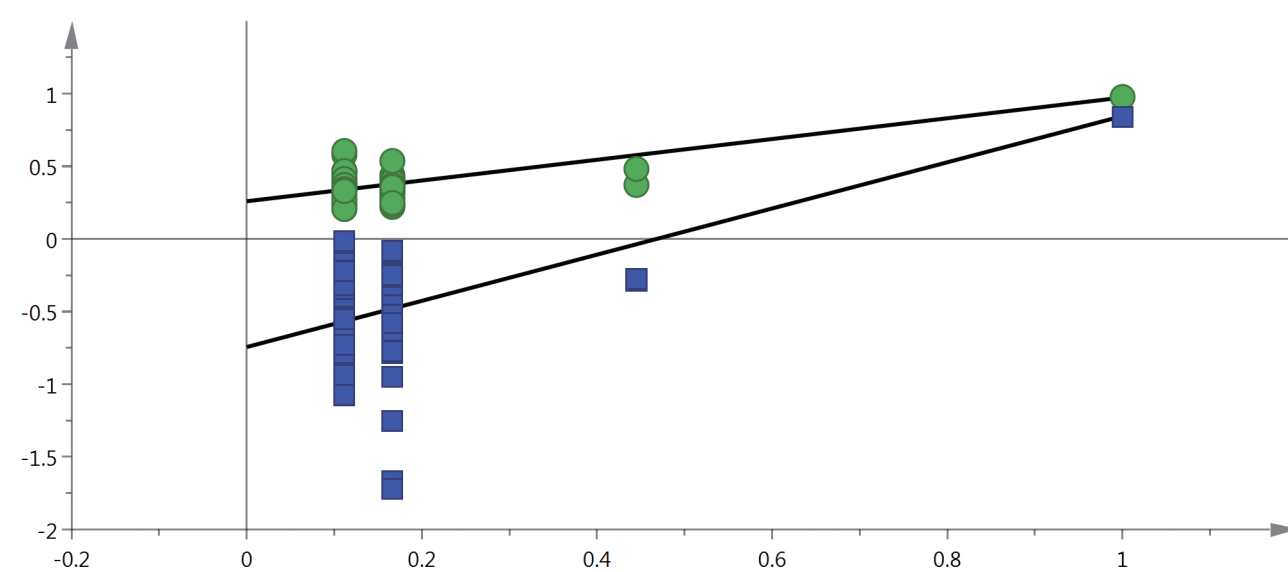

(C)

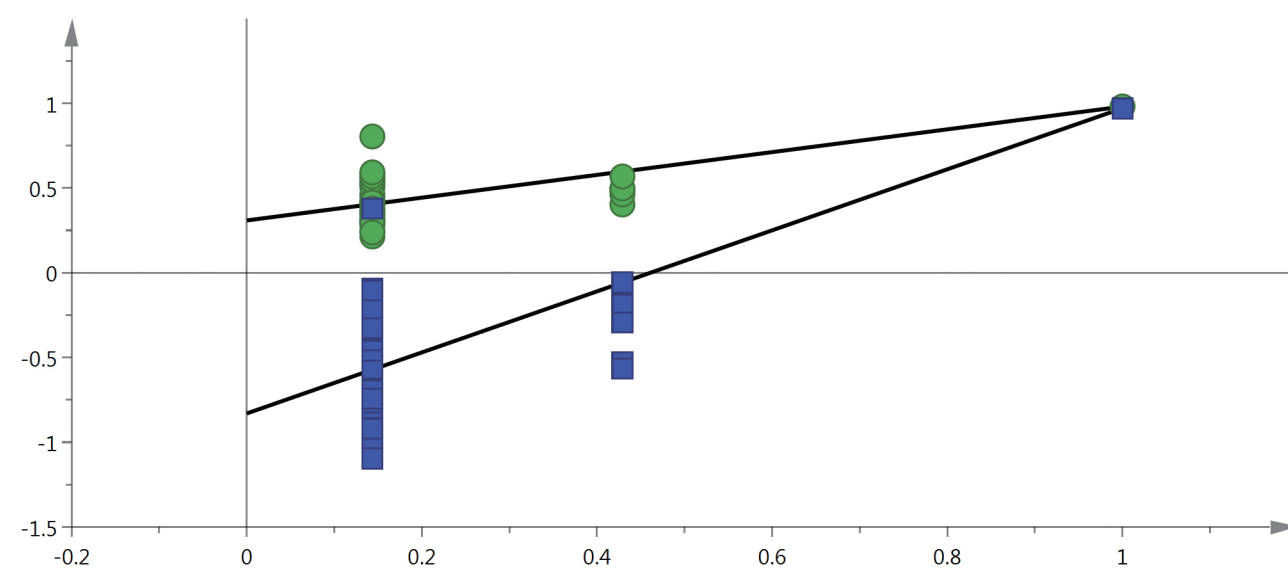

**ATR-FTIR**

(A)

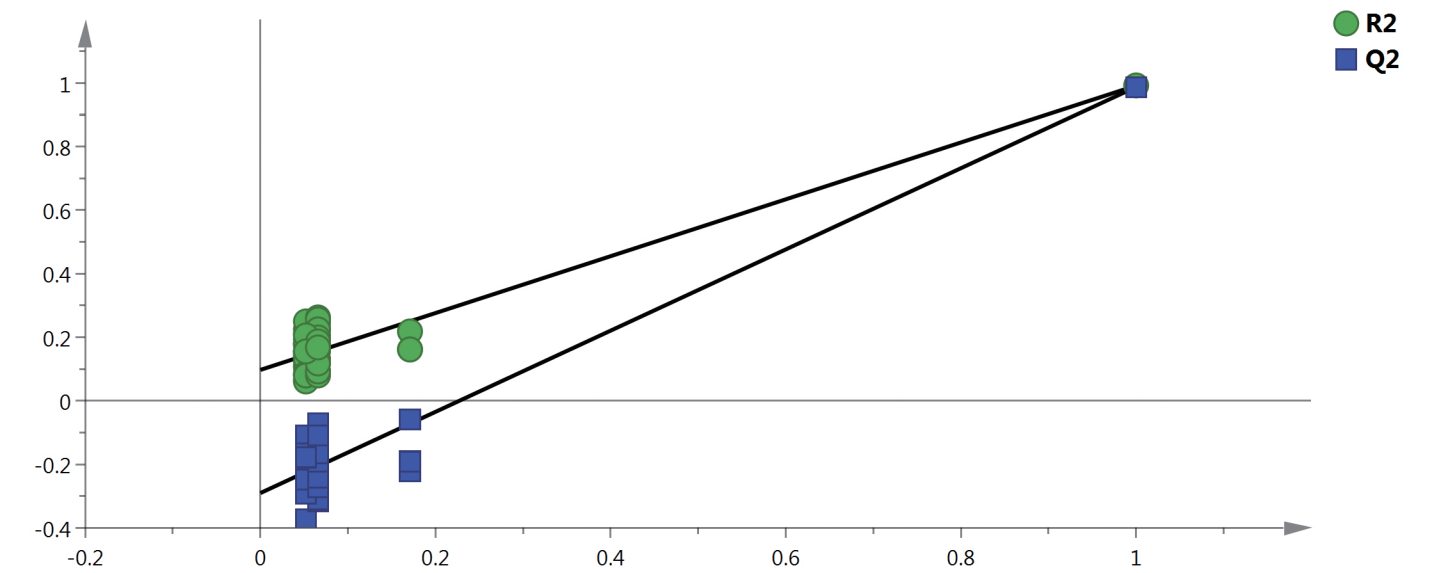

(B)

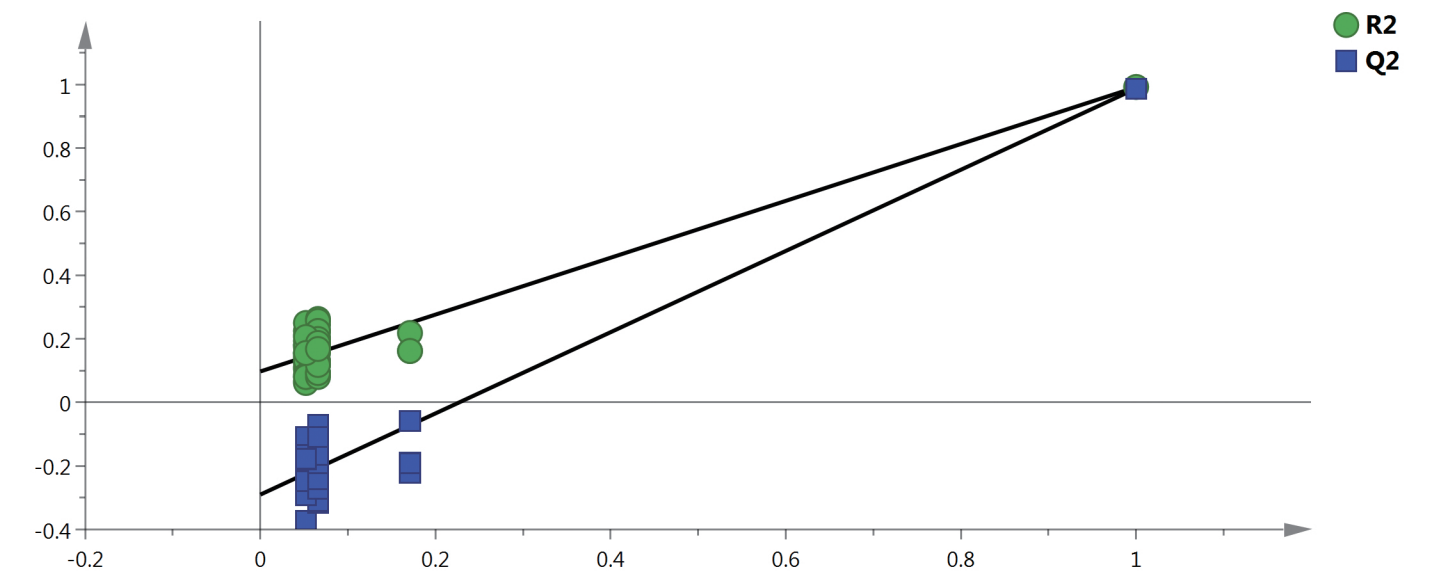

(C)

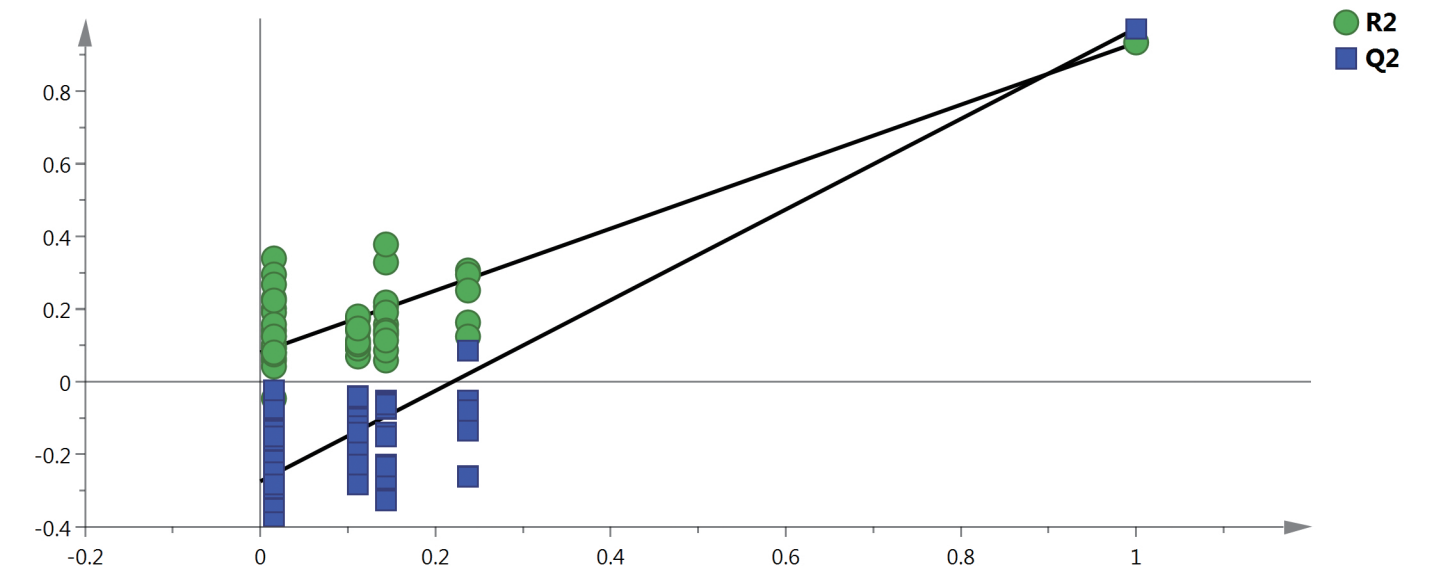

Figure S2

CHCs

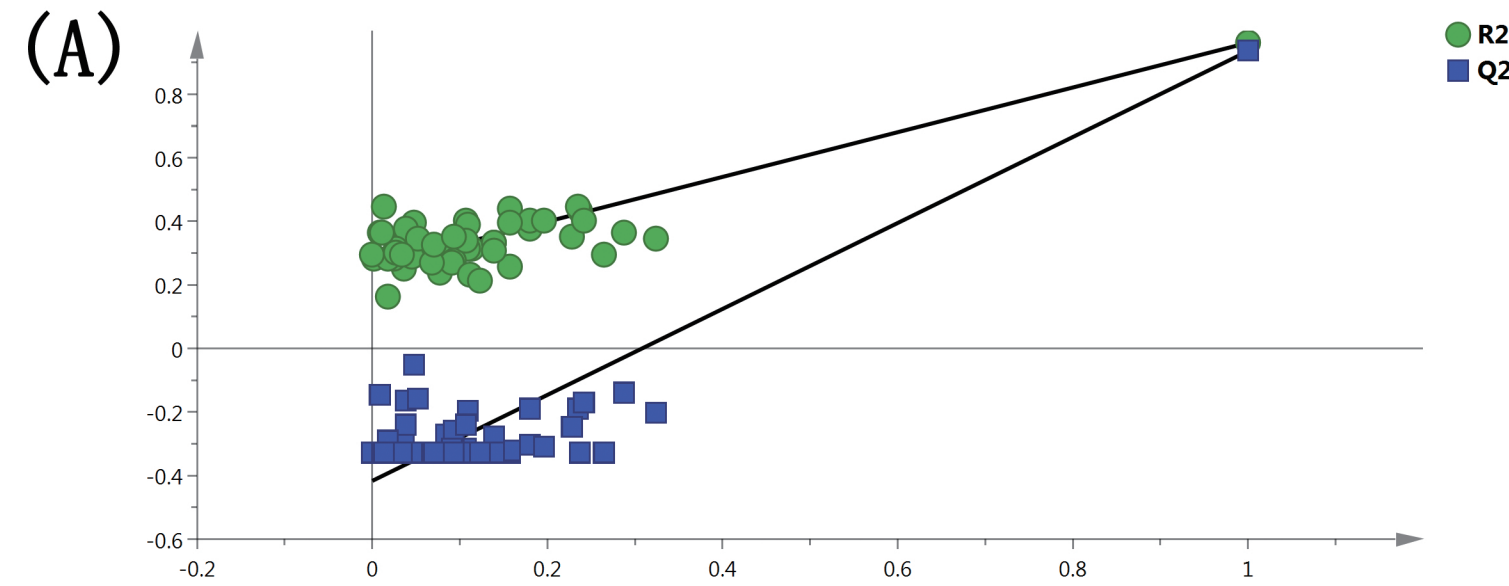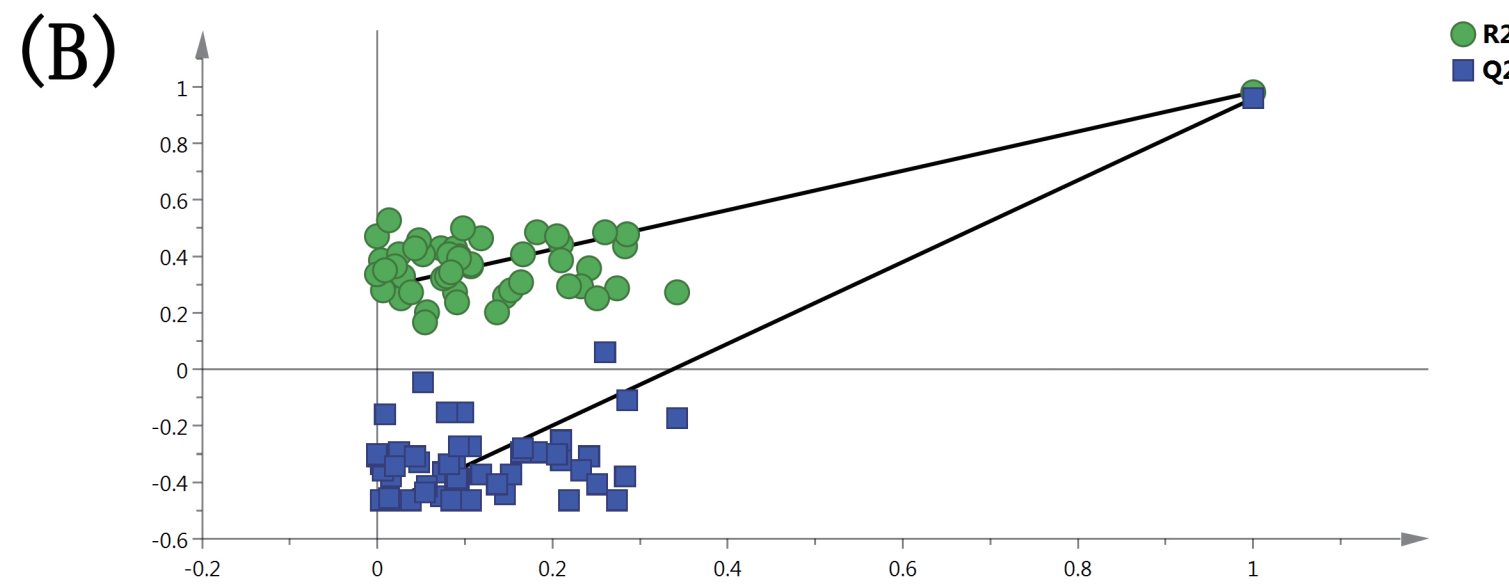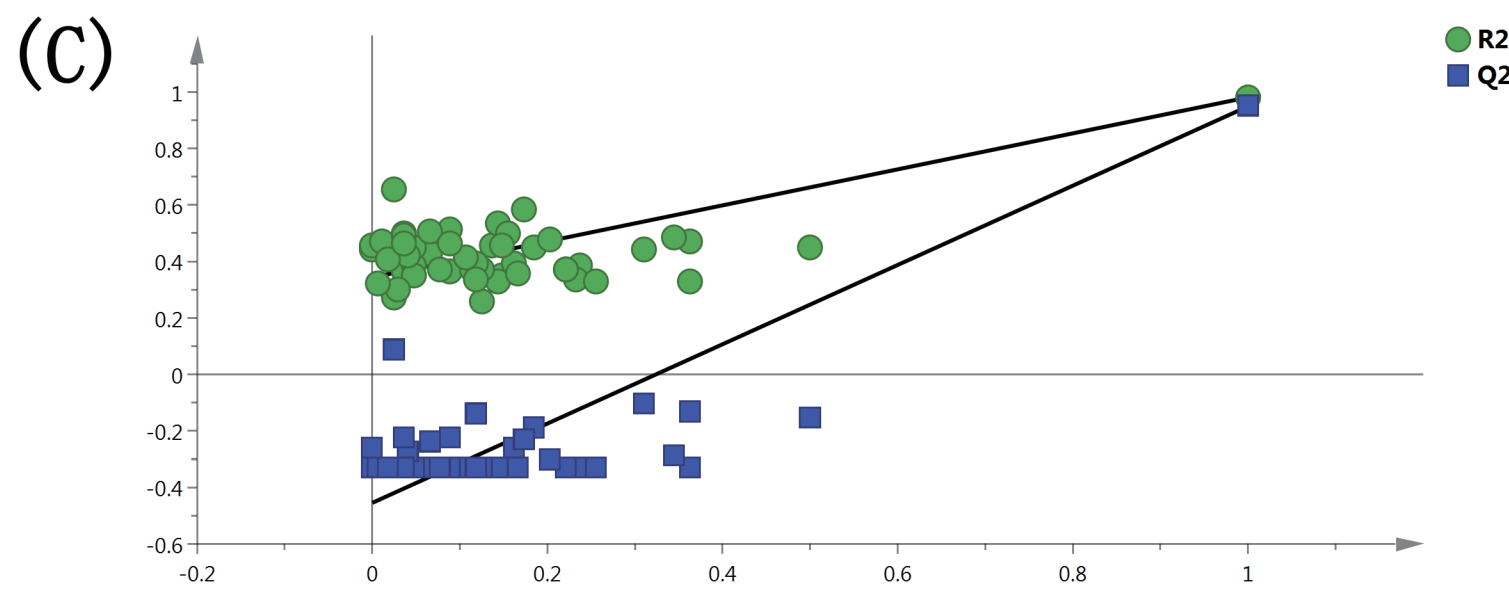

ATR-FTIR

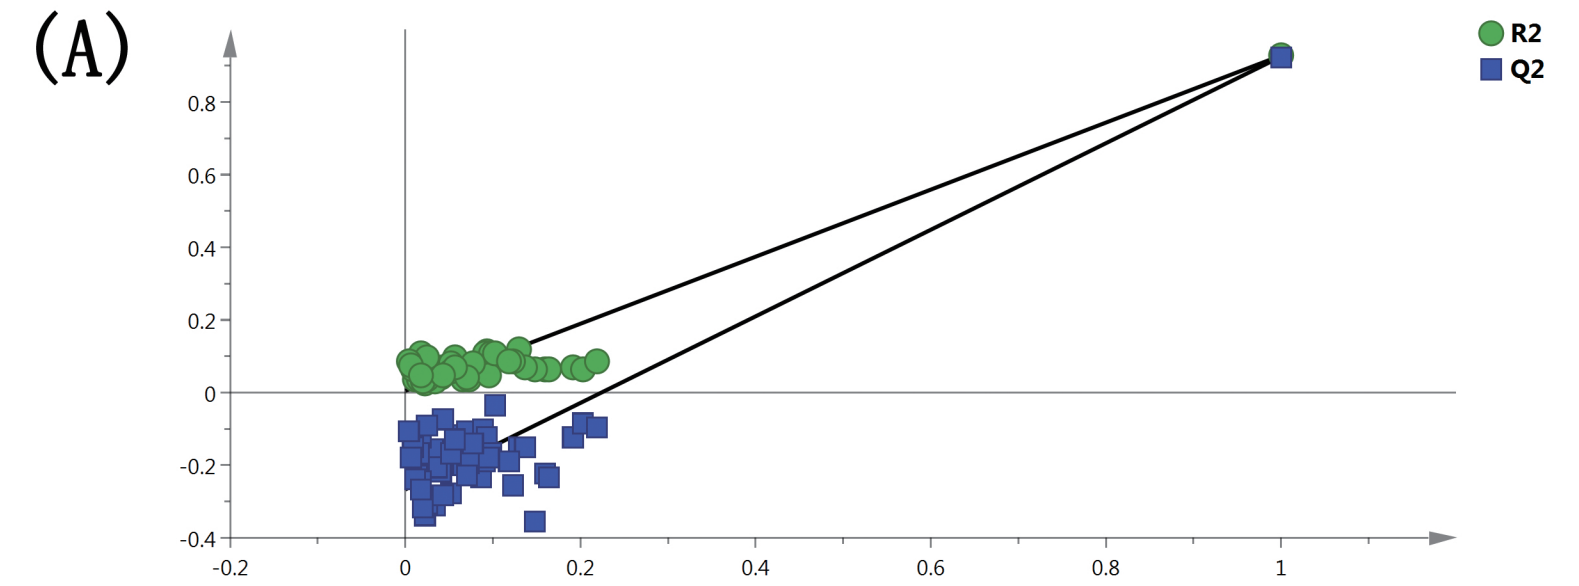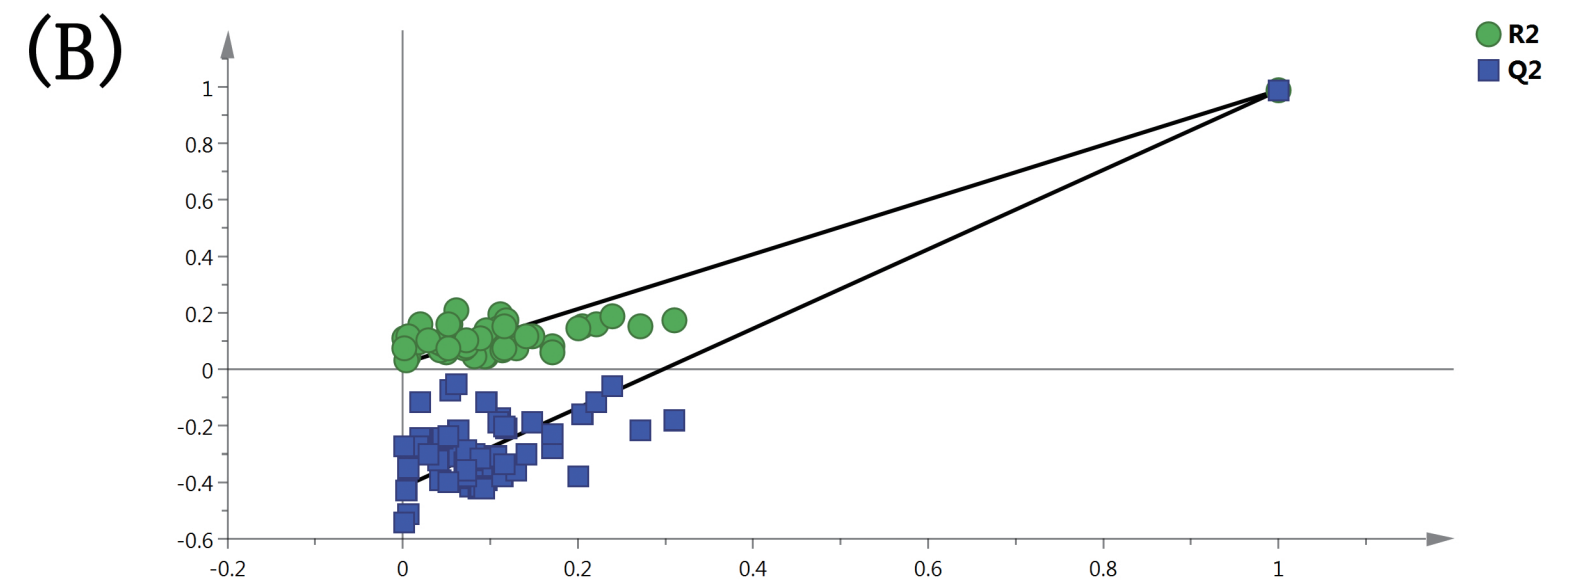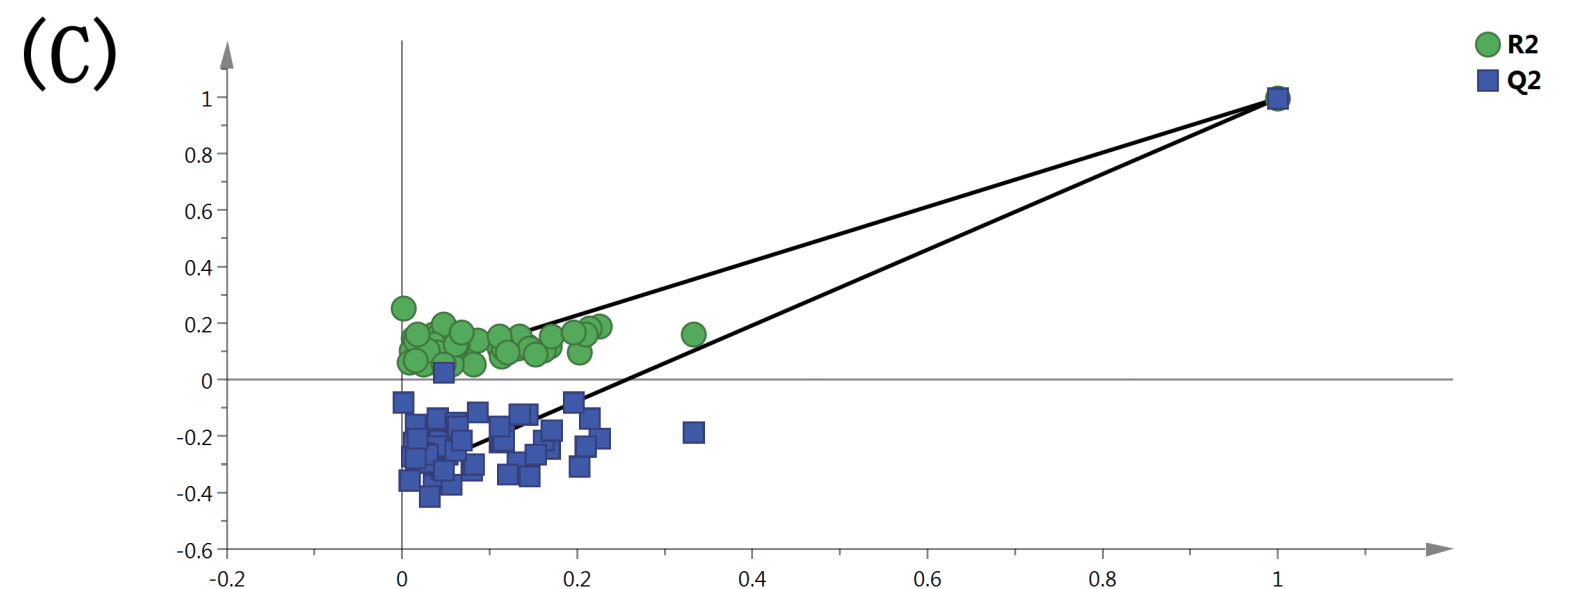

Supplement: s1 [file s1]
